# Consciousness is supported by near-critical cortical electrodynamics

Daniel Toker<sup>1</sup>, Ioannis Pappas<sup>2,3</sup>, Janna D. Lendner<sup>2,4</sup>, Joel Frohlich<sup>1</sup>, Diego M. Mateos<sup>5,6,7</sup>, Suresh Muthukumaraswamy<sup>8</sup>, Robin Carhart-Harris<sup>9,10</sup>, Michelle Paff<sup>11</sup>, Paul M. Vespa<sup>12</sup>, Martin M. Monti<sup>1,12</sup>, Friedrich T. Sommer<sup>2,13</sup>, Robert T. Knight<sup>2,3</sup>, and Mark D'Esposito<sup>2,3</sup>

<sup>1</sup>Department of Psychology, University of California, Los Angeles, Los Angeles, USA; <sup>2</sup>Helen Wills Neuroscience Institute, University of California, Berkeley, Berkeley, USA; <sup>3</sup>Department of Psychology, University of California Berkeley, Berkeley, CA, USA; <sup>4</sup>Department of Anesthesiology and Intensive Care, University Medical Center, Tuebingen, Tuebingen, Germany; <sup>5</sup>Consejo Nacional de Investigaciones Científicas y Técnicas de Argentina, Argentina; <sup>6</sup>Universidad Autónoma de Entre Ríos, Paraná, Entre Ríos, Argentina; <sup>7</sup>Instituto de Matemática Aplicada del Litoral, Santa Fe, Argentina; <sup>8</sup>School of Pharmacy, Faculty of Medical and Health Sciences, The University of Auckland, Auckland, New Zealand; <sup>9</sup>Neuropsychopharmacology Unit, Centre for Psychiatry, Imperial College London, London, UK; <sup>10</sup>Centre for Psychedelic Research, Department of Psychiatry, Imperial College London, London, UK; <sup>11</sup>Department of Neurological Surgery, University of California, Irvine, Irvine, USA; <sup>12</sup>Brain Injury Research Center (BIRC), Department of Neurosurgery, University of California Los Angeles, Los Angeles, USA; <sup>13</sup>Redwood Center for Theoretical Neuroscience, University of California, Berkeley, Berkeley, USA

This manuscript was compiled on May 3, 2021

**Mounting evidence suggests that during conscious states, the electrodynamics of the cortex are poised near a critical point or phase transition, and that this near-critical behavior supports the vast flow of information through cortical networks during conscious states. Here, for the first time, we empirically identify the specific critical point near which conscious cortical dynamics operate as the edge-of-chaos critical point, or the boundary between periodicity/stability and chaos/instability. We do so by applying the recently developed modified 0-1 chaos test to electrocorticography (ECoG) and magnetoencephalography (MEG) recordings from the cortices of humans and macaques across normal waking, generalized seizure, GABAergic anesthesia, and psychedelic states. Our evidence suggests that cortical information processing is disrupted during unconscious states because of a transition of cortical dynamics away from this critical point; conversely, we show that psychedelics may increase the information-richness of cortical activity by tuning cortical electrodynamics closer to this critical point. Finally, we analyze clinical electroencephalography (EEG) recordings from patients with disorders of consciousness (DOC), and show that assessing the proximity of cortical electrodynamics to the edge-of-chaos critical point may be clinically useful as a new biomarker of consciousness.**

consciousness | criticality | complexity | anesthesia | epilepsy | psychedelics | disorders of consciousness

## Introduction

What are the dynamical properties of electric brain activity that are necessary for consciousness, and how are those properties disrupted during unconscious states such as surgical anesthesia, generalized seizures, coma, and vegetative states?

One possibility, which is suggested by a large body of recent evidence, is that the electrodynamics of the conscious brain are poised near some sort of phase transition or "critical point," and that this near-critical behavior supports the vast flow of information through the brain during conscious states (1, 2). A critical point refers to the knife's edge in between different phases of a system (e.g. liquid to solid water) or types of dynamical states (e.g. laminar to turbulent airflow). It is widely believed that electrodynamics of both micro- and macro-scale cortical networks are poised near some critical point, because power-law statistics, which are a key signature of criticality (3), are consistently identified in recordings of neural electrodynamics (4, 5). And such critical behavior is

known to have important computational benefits: because critical and near-critical systems tend to have a high capacity for encoding and transmitting information (6–9), it is widely believed that being poised at - or at least *near* (10, 11) - criticality of some form endows neural populations with a high capacity for encoding sensory signals and for communicating with other neural populations (4, 5, 12), particularly during conscious states (1, 2). On the flip side, because signatures of cortical criticality have been observed to disappear or diminish during unconscious states (4, 13, 14), it may be that a transition of cortical activity away from criticality is what underlies the disruption to cortical information processing during unconscious states (2).

Though the existing evidence supports this conjectured relationship between criticality, cortical information processing, and conscious vs. unconscious brain states, prior empirical work has, for the most part, relied on the detection of power-law statistics in neural electrodynamics, most typically in the form of "neuronal avalanches" or bursts of electric activity whose sizes follow a power-law distribution, in order to infer neural criticality during conscious states and a loss of criticality during unconscious states (15); but, the detection of power-law statistics alone cannot specify the type of critical point a system is poised at, because power-law statistics ap-

## Significance Statement

What changes in the brain when we lose consciousness? One possibility is that the loss of consciousness corresponds to a transition of the brain's electric activity away from edge-of-chaos criticality, or the knife's edge in between stability and chaos. Recent mathematical developments have produced novel tools for testing this hypothesis, which we apply for the first time to cortical recordings from diverse brain states. We show that the electric activity of the cortex is indeed poised near the boundary between stability and chaos during conscious states and transitions away from this boundary during unconsciousness, and that this transition disrupts cortical information processing.

Please provide details of author contributions here.

We declare no competing interests.

<sup>2</sup>To whom correspondence should be addressed. E-mail: danieltoket@ucla.edu

44 pear across many types of phase transitions (3). Moreover,  
45 neuronal avalanches can arise in non-critical neural systems  
46 (16), and neural networks can display several unique dynamical  
47 critical points, only one of which is the phase transition that  
48 gives rise to neuronal avalanches (17). Though some prior  
49 studies have attempted to use alternative metrics to assess  
50 the relationship between neural criticality and consciousness  
51 (18–20), the precise form of criticality under consideration  
52 has largely remained mathematically unspecified (15), which  
53 leaves open the fundamental question: what, exactly, is this  
54 phase transition near which cortical electrodynamics seem to  
55 operate during conscious states? Put another way: what, from  
56 a mathematical perspective, are the dynamical phases that lie  
57 on either side of this critical point? Terms like "order" and  
58 "disorder" have commonly been used to describe the phases on  
59 either side of neural criticality, but these terms are imprecise  
60 unless they are defined relative to the breaking of a specific  
61 form of mathematical symmetry, where the "ordered" phase of  
62 a system is the symmetry-broken phase (in the way that ice  
63 is the "ordered" phase of water relative to the freezing critical  
64 point, because water loses its translational and rotational  
65 symmetry at this phase transition) - see SI Appendix, Supple-  
66 mentary Note 1 for a more detailed discussion of this point.  
67 Imprecise use of terms like "order" and "disorder" can also be  
68 misleading in the context of neural criticality. For example,  
69 chaos, which is defined as exponential sensitivity to small  
70 perturbations, is often used interchangeably with "disorder" in  
71 the literature on neural criticality (15), but chaos is in fact the  
72 "ordered" phase of dynamical systems because it corresponds  
73 to the breaking of topological or de-Rahm supersymmetry (21)  
74 (SI Appendix, Supplementary Note 1). This inconsistency  
75 and lack of mathematical specificity in definitions of neural  
76 criticality may underlie the apparent variability of prior results  
77 relating criticality to different brain states, where, for example,  
78 some purported metrics of criticality seem to suggest that  
79 seizures constitute a departure from criticality while others  
80 seem to suggest that seizures are in fact critical phenomena  
81 (22). If, as has been proposed (1), the disruption to cortical  
82 information processing during unconscious states is mediated  
83 by an excursion of cortical dynamics away from some sort of  
84 critical point during these states, then mathematically precise  
85 identification of this critical point may be crucial for improving  
86 both our theoretical and clinical grasp on the neural correlates  
87 of consciousness.

88 Here, we provide the first direct empirical evidence for the  
89 hypothesis (23) that during conscious states, cortical electrody-  
90 namics specifically operate near a mathematically well-defined  
91 critical point known as edge-of-chaos criticality, which is the  
92 phase transition from periodic/stable to chaotic/unstable dy-  
93 namics. Many systems (6–9, 24), including deep neural net-  
94 works (24) and echo state networks (8), have been shown to ex-  
95 hibit their highest capacity for information processing precisely  
96 at this specific critical point. In line with this well-replicated  
97 phenomenon, we show that excursions of low-frequency cortical  
98 activity away from this critical point during generalized  
99 seizures and GABAergic anesthesia induce both a loss of infor-  
100 mation in cortical dynamics as well as a loss of consciousness.  
101 We moreover show that lysergic acid diethylamide (LSD), a  
102 5-HT<sub>2A</sub> receptor agonist characterized as a hallucinogen or  
103 "psychedelic," may tune cortical dynamics closer to the edge-  
104 of-chaos critical point relative to normal waking states, which

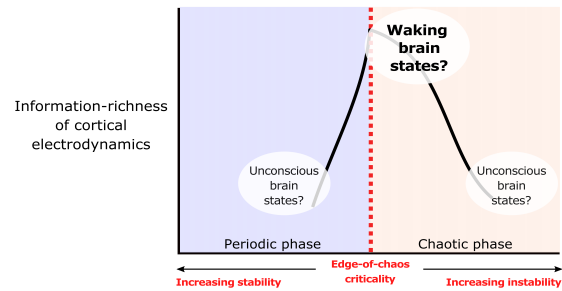

**Fig. 1. Hypothesized relationship between consciousness, edge-of-chaos criticality, and cortical information processing.** We suggest that the electrodynamics of the cortex may be poised near the edge-of-chaos critical point during conscious states, and transition away from this specific critical point during unconscious states. According to this hypothesis, transitions of cortical electrodynamics away from this critical point - either into the chaotic phase (leading to dynamical instability) or into the periodic phase (leading to hyper-stability) - should disrupt cortical information processing and induce unconsciousness. In other words, we should expect to see an inverse-U relationship between chaoticity and information processing in the cortex, with cortical dynamics during conscious states near the top of this inverse-U (i.e., in the near-critical, information-rich regime), and we should moreover expect to see cortical dynamics during unconscious states at either the bottom right of this inverse-U (i.e., the unstable, information-poor regime) or at the bottom left of this inverse-U (i.e., the hyper-stable, information-poor regime) (1, 2, 21). Such an inverse-U relationship between chaoticity and information processing has been observed in many other dynamical systems (6–9), but remains to be empirically observed in the brain.

increases the information-richness of cortical activity. Finally, 105  
we provide preliminary evidence that cortical electrodynamics 106  
return to the vicinity of this critical point as patients with 107  
disorders of consciousness (DOC) regain awareness, which 108  
suggests that assessing the proximity of cortical dynamics 109  
to edge-of-chaos criticality may be useful as a new clinical 110  
biomarker of consciousness. We provide Matlab (R2020a) code 111  
for our analysis in the hopes of facilitating further basic and 112  
translational research along these lines. 113

## 114 Results

**115 Mean-field dynamics.** To empirically assess whether cortical  
116 dynamics operate near the edge-of-chaos critical point during  
117 conscious states, and whether this underpins the information-  
118 richness of cortical dynamics during conscious states (Fig. 1),  
119 we must first assess varying levels of chaoticity and information-  
120 richness in a model of cortical electrodynamics, and then test  
121 whether real data agree with the model's predictions. The reason  
122 we must first analyze a model is because a system's level of  
123 stability can only be detected with certainty in a simulation,  
124 where noise and initial conditions can be precisely controlled.  
125 For this reason, it is generally agreed (25) that empirical evi-  
126 dence of varying levels of chaos in a biological system requires  
127 comparison of real data to an accurate model of the biological  
128 system of interest. Toward that end, we assessed the mean-  
129 field model of macro-scale cortical electrodynamics developed  
130 by Steyn-Ross, Steyn-Ross, and Sleight (26) because it has been  
131 shown to successfully model the low-frequency macro-scale  
132 cortical electrodynamics of waking conscious (26), generalized  
133 seizure (26–28), and GABAergic anesthesia (26, 29) states,  
134 and thus can be compared to real recordings of large-scale  
135 cortical electrodynamics across these diverse brain states. The  
136 model is also unique in its inclusion of gap junction coupling  
137 between cortical interneurons, which recent empirical work in

zebrafish has shown is an important mechanism for the maintenance of criticality in electric neural activity (30). Using this model, we generated 10-second simulations of macro-scale cortical electrodynamics corresponding to waking conscious, generalized seizure, and GABAergic anesthesia states (using parameter ranges identified in past studies - see Materials and Methods), and additionally performed a parameter sweep on the model to generate dynamics from 773 non-biologically specific states in order to more broadly assess the relationship between proximity to edge-of-chaos criticality and information-richness (see Materials and Methods). For each biologically specific and non-biologically specific state, we calculated the largest Lyapunov exponent, which is a mathematically formal measure of chaoticity that can only be accurately estimated in simulations, of the deterministic component of the model's dynamics (i.e., with the model's noise inputs turned off - see Materials and Methods). Note that a largest Lyapunov exponent of 0 corresponds to edge-of-chaos criticality, a positive largest Lyapunov exponent corresponds to chaos/instability, and a negative largest Lyapunov exponent corresponds to periodicity/stability. Finally, to assess the information-richness of the model's behavior, we calculated the Lempel-Ziv complexity of its full dynamics (with noise inputs turned on) using three variants of Lempel-Ziv complexity (see Materials and Methods). As a measure of the compressibility of a time-series (31), Lempel-Ziv complexity directly quantifies the amount of non-redundant information in a time-series, as compressibility is mathematically lower-bounded by the amount of unique information in a signal (32). While there are several measures of information-richness (e.g. Shannon entropy), we here use Lempel-Ziv complexity both because it can be accurately estimated from short, noisy, nonlinear time-series, and because the Lempel-Ziv complexity of cortical electrodynamics has been shown to consistently drop during unconscious states - see Frohlich et al (33) for an in-depth discussion of the relationship between Lempel-Ziv complexity and consciousness, including a critical assessment of purported dissociations between Lempel-Ziv complexity and conscious vs. unconscious brain states.

Consistent with the prediction that the cortex generates information-rich dynamics during conscious states by operating near the edge-of-chaos critical point, we found that the Lempel-Ziv complexity of the model's simulated electrodynamics (with noise inputs) was maximal when the deterministic component of its dynamics were poised near this critical onset of chaos (red vertical line in Fig. 2A), and that the model's simulation of the conscious, waking state was near this critical, information-rich regime. The model specifically placed waking, conscious cortical dynamics on the chaotic/unstable side of this critical edge (black circle in Fig. 2A). Moreover, as predicted, the model exhibited a general inverse-U relationship between chaoticity and information-richness, with the amount of non-redundant information generated by its dynamics falling both in the chaotic/unstable phase (bottom right of the inverse-U) and in the periodic/stable phase (bottom left of the inverse-U), similar to what has been shown in many other systems (6-9, 34). To quantitatively confirm this qualitative result, we used Simonsohn's two lines statistical test of a U-shaped relationship, which accepts a null hypothesis of no U-shaped relationship if either of two opposite-sign regression lines (one for high and one for low values of the  $x$

variable) are statistically insignificant - see Simonsohn (35) for details on this test. The two lines test failed to reject the null hypothesis no U-shaped relationship between largest Lyapunov exponents and univariate, joint, or concatenated Lempel-Ziv complexity (Table 1). Finally, we note that the mean-field model specifically placed GABAergic anesthesia in the strongly chaotic/unstable phase and placed generalized seizures in the periodic/stable phase, even though both simulated states led to information loss (Fig. 2A) and increased spectral power at low frequencies (SI Appendix, Fig. S1).

Such predictions of varying degrees of chaoticity in real biological systems have historically been difficult to test, but recent mathematical developments in nonlinear time-series analysis now allow for accurate detection of chaoticity from noisy time-series data. In particular, the modified 0-1 chaos test has emerged as a robust measure of instability from noisy recordings (25, 36-40) (see Materials and Methods). Given a recorded time-series, the 0-1 chaos test outputs a statistic  $K$ , which estimates the degree of chaoticity of a (predominantly) deterministic signal on a scale from 0 to 1; lower values indicate periodicity/stability and higher values indicate chaos/instability. In order to specifically assess the chaoticity of low-frequency cortical electrodynamics (as simulated in the mean-field model), we low-pass filtered all time-series data in this study before applying the modified 0-1 chaos test. While low-pass filter cutoffs are often selected at canonical frequency bands, recent work has shown that this approach can induce spurious oscillations when no such oscillations are present, and can moreover obfuscate natural but meaningful variance in oscillation frequencies across channels, subjects, and species; for these reasons, to select low-pass filter cutoffs for every channel in every trial, we used the data-driven "Fitting Oscillations and One Over F" or "FOOOF" algorithm, which helps identify real channel-specific oscillations and their respective frequencies based neural power spectra (41). We then applied the modified 0-1 chaos test to these low-pass filtered signals (see Materials and Methods for more details). In addition, we verified that the majority of signals analyzed in this paper were generated by predominantly deterministic processes (SI Appendix, Tables S1-S2), which is an important assumption of the modified 0-1 chaos test. Finally, where applicable, our statistical analyses included these selected low-pass filter frequencies as a covariate, in order to ensure that our results are driven by the stability of low-frequency cortical oscillations, rather than by their frequencies.

Confirming the ability of the modified 0-1 chaos test to detect varying levels of chaoticity from real time-series data, we found that its  $K$ -statistic, when applied to the model's simulated dynamics (with noise inputs turned on) after low-pass filtering using the FOOOF algorithm, was strongly correlated with the ground-truth largest Lyapunov exponent of the deterministic component of the mean-field model's dynamics (which can only be estimated in simulations) ( $r=0.84$ ,  $p<10^{-4}$  Bonferroni-corrected; partial correlation  $\rho=0.82$  after controlling for selected low-pass filter frequencies,  $p<10^{-4}$  Bonferroni-corrected), and that this correlation was robust to high levels of both white and pink (1/f) measurement noise (Tables S3-S4). The  $K$ -statistic of these low-pass filtered signals was likewise correlated with the stochastic Lyapunov exponents of the model (i.e., with Lyapunov exponents calculated for partially stochastic simulations with identical noise inputs)

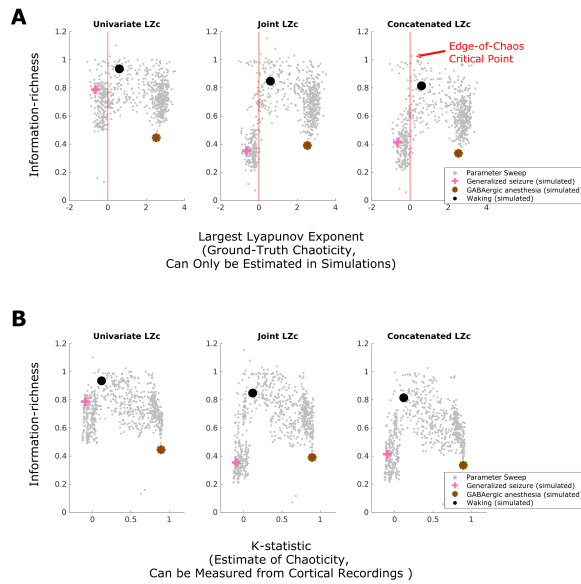

**Fig. 2. Predictions relating brain states, information processing, and the criticality of low-frequency cortical electrodynamics, and the testability of those predictions in real data.** **A** We calculated both the largest Lyapunov Exponent (ground-truth instability) and Lempel-Ziv complexity (information-richness) of 10-second mean-field simulations of low-frequency cortical electrodynamics during waking conscious (black circle), generalized seizure (pink cross), and GABAergic anesthesia (brown asterisk) states. We also performed a parameter sweep of the mean-field model to more generally assess the relationship between the information-richness of its dynamics and the proximity of those dynamics to this critical point (see Materials and Methods); each small gray dot represents the result of a single 10-second simulation with a unique parameter configuration that did not correspond to a biologically specific brain state. We found that all three measures of information-richness peak near the edge-of-chaos critical point (red vertical line), and that the simulated waking conscious dynamics are near this critical, information-rich regime. Importantly, waking cortical dynamics are here predicted to lie on the unstable side of this critical point. All three information measures drop in both the chaotic/unstable phase (positive largest Lyapunov exponent), where GABAergic anesthesia cortical dynamics are predicted to lie, and also in the periodic/stable phase (negative largest Lyapunov exponent), where generalized seizure dynamics are predicted to lie. **B** The modified 0-1 chaos test (see Materials and Methods), when applied to the low-pass filtered simulated dynamics of the mean-field model, accurately tracks the chaoticity of those dynamics and is able to recapitulate the ground-truth inverse-U relationship between chaoticity and information-richness. This validates the ability of the modified 0-1 chaos test to empirically evaluate these specific predictions relating consciousness, information processing, and the proximity of low-frequency cortical electrodynamics to the edge-of-chaos critical point in real cortical recordings.

( $r=0.83$ ,  $p<10^{-4}$ ; partial correlation  $\rho=0.81$  after controlling for selected low-pass filter frequencies,  $p<10^{-4}$ ). Moreover, the  $K$ -statistic was able to recapitulate the inverse-U relationship between chaoticity and Lempel-Ziv complexity in the model, as shown qualitatively in Fig. 2B. As was the case for the ground-truth largest Lyapunov exponents, Simonsohn's two lines test quantitatively confirmed the inverse-U relationship between the  $K$ -statistic and univariate, joint, and concatenated Lempel-Ziv complexity (Table 1). These results indicate that we can use the 0-1 test's  $K$ -statistic to empirically test, for the first time, the above-mentioned predictions relating consciousness, information-richness, and cortical instability relative to the edge-of-chaos critical point in real recordings of macro-scale cortical electrodynamics.

**Cortical electrodynamics confirm mean-field predictions.** We therefore applied the modified 0-1 chaos test to low-frequency activity extracted from surface electrocorticography (ECoG)

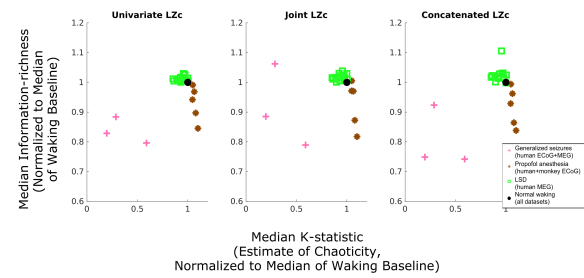

**Fig. 3. Transitions of low-frequency cortical electrodynamics away from the edge-of-chaos critical point induce a loss of information in cortical dynamics during unconscious states.** We applied the modified 0-1 chaos test to ECoG and MEG recordings from humans and macaques across different brain states in order to empirically assess the predicted relationship between proximity to edge-of-chaos criticality, consciousness, and the information-richness of cortical dynamics across each individual subject's trials, normalized to the median of their normal waking baseline. The observed inverse-U relationship between stability and information-richness, with cortical dynamics during conscious states at the top of this inverse-U, validates the prediction that cortical dynamics operate near the edge-of-chaos critical point during conscious states, transition deeper into the chaotic/unstable phase under GABAergic anesthesia, and transition into the periodic/stable phase during generalized seizures. These results support our hypothesis that these transitions away from edge-of-chaos criticality during unconscious states induce a loss of information in electrical cortical activity. Moreover, the counter-intuitive reduction of chaoticity coinciding with increased information-richness in the LSD state supports our prediction that waking cortical dynamics operate on the chaotic side of this critical point. See SI Appendix, Fig. S4 for statistical analysis of within-subject results.

recordings of the cortical electrodynamics of two macaques and five human epilepsy patients during normal waking states, of two macaques and three human epilepsy patients under GABAergic (propofol, or propofol and sevoflurane) anesthesia, and of two human epilepsy patients experiencing generalized seizures; we further applied this test to magnetoencephalography (MEG) recordings of the cortical electrodynamics of a third human epilepsy patient experiencing a generalized seizure. We also applied the 0-1 chaos test to the low-frequency component of MEG recordings of the cortical electrodynamics of 16 human subjects under the influence of either a saline placebo or LSD, as psychedelics are the only known compounds to reliably increase the information-richness of cortical electrodynamics (1, 2, 42, 43), and are thought to do so by tuning cortical dynamics closer to some critical point (2, 44). Psychedelics therefore allow us to test a specific and counter-intuitive prediction of this chaos-vs-information processing framework: if cortical electrodynamics during normal waking states do indeed lie on the chaotic side of the edge-of-chaos critical point (as the mean-field model predicts), then psychedelics should, counter-intuitively, increase the information-richness of cortical activity by *reducing* the chaoticity of cortical dynamics, as those dynamics approach the edge-of-chaos critical point from the unstable side of the edge (where normal waking dynamics are predicted to lie).

Confirming our predictions, our empirical analysis yielded an inverse-U relationship between chaoticity and information-richness (as measured by three variants of Lempel-Ziv complexity) in our recordings of cortical electrodynamics, with conscious states at the top of this inverse-U, as shown qualitatively in Fig. 3. To confirm this result quantitatively, we applied Simonsohn's two lines test to the median of each subject's  $K$ -statistic and Lempel-Ziv complexity over all trials from their altered states (seizure, anesthesia, LSD), normal-

311 ized to their own normal waking baseline (as shown in Fig. 3).  
 312 The test failed to reject the null hypothesis of no inverse-U  
 313 relationship between the normalized  $K$ -statistic and both uni-  
 314 variate and concatenated Lempel-Ziv complexity, but not joint  
 315 Lempel-Ziv complexity (Table 1). Moreover, as predicted,  
 316 our within-subject analyses showed significant increases in  
 317 chaoticity coinciding with significant drops in Lempel-Ziv com-  
 318 plexity in the anesthesia state; small but significant reductions  
 319 in chaoticity coinciding with significant increases in Lempel-  
 320 Ziv complexity in the LSD state; and significant reductions  
 321 in both chaoticity and Lempel-Ziv complexity during gener-  
 322 alized seizures (SI Appendix, Fig. S4). Furthermore, we  
 323 observed that the degree of reduction in chaoticity during  
 324 the LSD state relative to placebo (assessed by normalizing  
 325 each subject's median  $K$ -statistic during their LSD state by  
 326 their median during their normal waking state, as in Fig. 3)  
 327 was significantly correlated with subjects' behavioral ratings  
 328 (see Materials and Methods) of the intensity of the LSD expe-  
 329 rience (partial correlation  $\rho=0.55, p=0.033$ , controlling for  
 330 differences between placebo and LSD states in the median  
 331 frequency at which signals were low-pass filtered). In order to  
 332 assess whether median estimated chaoticity varied significantly  
 333 across brain states, independently of the frequency at which  
 334 signals were low-pass filtered, we performed a cross-subject  
 335 non-parametric (permutation-based, 1000 permutations) anal-  
 336 ysis of covariance (ANCOVA), with median  $K$ -statistic as  
 337 the response variable, brain state (i.e. normal waking, gen-  
 338 eralized seizure, anesthesia, or LSD) as the group label, and  
 339 median frequency at which signals were low-pass filtered as  
 340 the covariate. We observed significant variation in estimated  
 341 chaoticity across states ( $F=61.765, p=0.001$ ) with no effect  
 342 of either median low-pass filter frequency ( $F=0.116, p=0.752$ )  
 343 or interaction between median low-pass filter frequency and  
 344 estimated chaoticity ( $F=0.214, p=0.959$ ). The same result  
 345 was obtained for chaoticity estimates normalized to each sub-  
 346 ject's individual normal waking baseline (as reported in Fig.  
 347 3) ( $F=130.202, p=0.001$ ), again with no effect of either med-  
 348 ian low-pass filter frequency ( $F=0.188, p=0.661$ ) or interac-  
 349 tion between median low-pass filter frequency and estimated  
 350 chaoticity ( $F=0.414, p=0.922$ ). Furthermore, our analyses of  
 351 surrogate time-series not only suggest that low-frequency cor-  
 352 tical electrodynamics are predominantly deterministic, but  
 353 also show no difference in the level of stochasticity of cortical  
 354 dynamics across brain states (SI Appendix, Tables S1-S2),  
 355 which suggests that these between-condition differences were  
 356 likely driven by changes in the relative stability of cortical  
 357 dynamics across different brain states as predicted, rather  
 358 than to changing levels of intrinsic noise in cortical networks.  
 359 Finally, we compared the low-frequency power spectral den-  
 360 sities of our real and simulated cortical electrodynamics, and  
 361 observed spectral changes that were consistent across our real  
 362 and simulated data (SI Appendix, Figs. S1-S3), which lends  
 363 further support to the model's prediction of increased or de-  
 364 creased chaoticity relative to the edge-of-chaos critical point  
 365 in these different states.

366 **Edge-of-chaos criticality is a potential clinical biomarker of**  
 367 **consciousness.** The above findings support the hypothesis  
 368 that the low-frequency electrodynamics of the cortex during  
 369 conscious states are poised near the edge-of-chaos critical point,  
 370 and specifically operate on the unstable side of this critical  
 371 point. This implies that use of the modified 0-1 chaos test

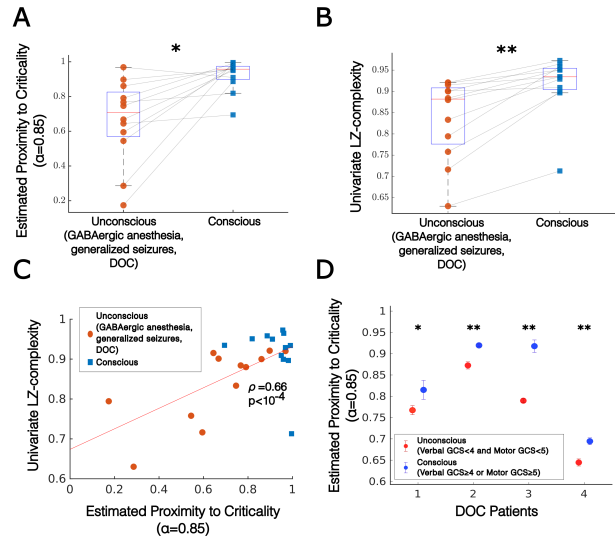

**Fig. 4. Criticality predicts consciousness.** **A** Using our new time-series measure of criticality (derived from the 0-1 chaos test - see Materials and Methods), we estimated the proximity of low-frequency cortical dynamics to edge-of-chaos criticality in 12 subjects for whom data were available from both conscious and unconscious states (namely, five GABAergic anesthesia subjects, three generalized seizure subjects, and four DOC patients). Our criticality measure includes a parameter  $\alpha$ , which we here set to 0.85, based on our parameter analysis (see SI Appendix, Fig. S5). Estimates of proximity to edge-of-chaos criticality were significantly higher ( $p < 10^{-4}$  before Bonferroni correction for comparisons at multiple values of  $\alpha$ , and  $p=0.0157$  after Bonferroni correction) in conscious states than in unconscious states (significance was tested using a right-tailed Wilcoxon rank-sum test). **B** Cross-trial, within-subject medians of univariate Lempel-Ziv complexity were significantly higher ( $p=0.003$ ) during conscious states than during unconscious states. See SI Appendix, Fig. S6 for comparisons using joint and concatenated Lempel-Ziv complexity. **C** Across the waking (blue square) and non-waking (red circle) states of all 12 subjects exhibiting transitions between consciousness and unconsciousness, cross-trial medians of estimated proximity to edge-of-chaos criticality (with  $\alpha=0.85$ ) were significantly correlated with cross-trial medians of univariate Lempel-Ziv complexity (partial correlation  $\rho=0.66, p < 10^{-4}$ , controlling for median frequency at which signals were low-pass filtered). See SI Appendix, Fig. S6 for comparisons using joint and concatenated Lempel-Ziv complexity. **D** As was the case for our cross-subject analysis (**A**), our within-subject, cross-trial analysis revealed significant increases in our criticality measure (with  $\alpha=0.85$ ) in four DOC patients as they recovered consciousness. Significance was assessed using a left-tailed overlapping block bootstrap test (which controls for dependencies across data points by preserving local time-series autocorrelations) with a block size of three trials (30 seconds of recording), to test against the null hypothesis that median estimated proximity to criticality during conscious states is not greater than median estimated proximity to criticality during unconscious states. Circles correspond to cross-trial medians, and errorbars indicate standard error of the median (estimated by taking the standard deviation of a bootstrap distribution of sample medians) \*  $p < 0.05$ , \*\*  $p < 0.01$ .

**Table 1. Results of Simonsohn’s Two-Lines Test of a U-shaped relationship (35). The test confirmed the U-shaped relationship (across different states of the mean-field model of cortical electrodynamics) between all three measures of Lempel-Ziv complexity (LZc) and chaoticity, as measured by both ground-truth largest Lyapunov exponents (LLE) and the K-statistic of the modified 0-1 chaos test. The test also confirmed the U-shaped relationship (across subjects) in our cortical recordings between chaoticity, as measured by the K-statistic, and both univariate and concatenated Lempel-Ziv complexity. P-values were Bonferroni-corrected for multiple comparisons against the same set of either largest Lyapunov exponents (LLE) or K-statistic values.**

| Simonsohn’s Two-Lines Test Results |                                      |                                        |
|------------------------------------|--------------------------------------|----------------------------------------|
|                                    | Regression Line 1                    | Regression Line 2                      |
| <b>Simulation data</b>             |                                      |                                        |
| LLE vs Univariate LZc              | b=0.1, z=5.65, p< 10 <sup>-4</sup>   | b=-0.06, z=-5.44, p< 10 <sup>-4</sup>  |
| LLE vs Joint LZc                   | b=0.4, z=11, p< 10 <sup>-4</sup>     | b=-0.08, z=-8.39, p< 10 <sup>-4</sup>  |
| LLE vs Concatenated LZc            | b=0.29, z=8.89, p< 10 <sup>-4</sup>  | b=-0.08, z=-6.98, p< 10 <sup>-4</sup>  |
| K vs Univariate LZc                | b=0.71, z=11.76, p< 10 <sup>-4</sup> | b=-0.28, z=-11.99, p< 10 <sup>-4</sup> |
| K vs Joint LZc                     | b=1.79, z=25.4, p< 10 <sup>-4</sup>  | b=-0.32, z=-11.66, p< 10 <sup>-4</sup> |
| K vs Concatenated LZc              | b=1.49, z=21.49, p< 10 <sup>-4</sup> | b=-0.36, z=-12.62, p< 10 <sup>-4</sup> |
| <b>Empirical data</b>              |                                      |                                        |
| K vs Univariate LZc                | b=0.26, z=10.74, p< 10 <sup>-4</sup> | b=-1.03, z=-8.42, p< 10 <sup>-4</sup>  |
| K vs Joint LZc                     | b=0.12, z=1.99, p=0.137              | b=-1.38, z=-6.55, p< 10 <sup>-4</sup>  |
| K vs Concatenated LZc              | b=0.33, z=6.01, p< 10 <sup>-4</sup>  | b=-1.25, z=-10, p< 10 <sup>-4</sup>    |

372 to assess the proximity of cortical electrodynamics to edge-of-  
 373 chaos criticality, or to the unstable side of this phase transition,  
 374 may be clinically useful as a novel tool for monitoring depth  
 375 of anesthesia or diagnosing and monitoring emergence from  
 376 disorders of consciousness - a group of conditions for which  
 377 new biomarkers are sorely needed (45). Toward that end, we  
 378 here introduce a novel time-series estimate  $c$  of proximity to  
 379 edge-of-chaos criticality, based on a nonlinear transformation  
 380 of the  $K$ -statistic (see Materials and Methods). Our measure  
 381  $c$  includes a parameter  $\alpha$ , set between 0 and 1, such that  $c$  will  
 382 approach 1 as the  $K$ -statistic approaches  $\alpha$ , and will approach  
 383 0 as the  $K$ -statistic approaches either 0 (periodicity) or 1  
 384 (strong chaos). Note that  $\alpha$  values nearer to 0 will bias our  
 385 criticality measure to assign higher values to systems on the  
 386 stable side of the edge-of-chaos critical point, while  $\alpha$  values  
 387 nearer to 1 will bias our measure to assign higher values to  
 388 systems on the chaotic side of the critical point.

389 To test the diagnostic utility of this new criticality measure  
 390  $c$ , we applied our chaos analysis pipeline (i.e. low-pass filtering  
 391 at a frequency determined by the FOOOF algorithm followed  
 392 by application of the modified 0-1 chaos test) to clinical EEG  
 393 data recorded from four traumatic brain injury patients as they  
 394 recovered consciousness (see Materials and Methods). Degree  
 395 of consciousness was assessed using the Glasgow Coma Scale  
 396 (GCS) as part of conventional bedside neurobehavioral testing.  
 397 Following prior work (46, 47), data were split into conscious  
 398 and unconscious states based on the verbal and motor sub-  
 399 scores of the GCS. Patients were considered conscious if either  
 400 their GCS verbal sub-score was greater than or equal to four  
 401 (meaning that they could answer questions) or if their motor  
 402 sub-score was greater than or equal to five (meaning that  
 403 they displayed clearly purposeful movement). We considered  
 404 patients unconscious if their verbal sub-score was less than four  
 405 and motor sub-score was less than five, though we note that  
 406 this criterion cannot differentiate between unconsciousness  
 407 and unresponsiveness/disconnectedness.

408 To test the utility of our criticality measure as a biomarker  
 409 of consciousness, we converted the median  $K$ -statistics of these

410 four patients in their unconscious and conscious states, along  
 411 with the median  $K$ -statistics of our five anesthesia subjects  
 412 and three generalized seizure subjects in their waking and  
 413 unconscious states, to our new criticality estimate  $c$ , using 19  
 414 unique values of its parameter  $\alpha$  ranging from 0.05 to 0.95 in  
 415 steps of 0.05. For each value of  $\alpha$ , we performed a cross-subject,  
 416 right-tailed Wilcoxon rank-sum test to compare estimates of  
 417 proximity to edge-of-chaos criticality in conscious versus uncon-  
 418 conscious states. Before correcting for multiple comparisons, esti-  
 419 mates of criticality were significantly higher during conscious  
 420 states for all  $\alpha$  values between 0.65 and 0.85; after conserva-  
 421 tive Bonferroni-correction,  $c$  at  $\alpha=0.85$  remained significantly  
 422 higher across subjects during conscious states than during  
 423 unconscious states ( $p < 10^{-4}$  before Bonferroni correction,  
 424  $p=0.016$  after Bonferroni correction) (SI Appendix, Fig. S5)  
 425 (Fig. 4A). A cross-subject Wilcoxon rank-sum test revealed no  
 426 significant difference in the median low-pass filter frequencies  
 427 selected by the FOOOF algorithm in conscious vs unconscious  
 428 states ( $p=0.795$ ), while right-tailed Wilcoxon rank-sum tests  
 429 showed that, across subjects, consciousness corresponded to  
 430 significantly higher values of univariate Lempel-Ziv complexity  
 431 ( $p=0.003$ ) (Fig. 4B) and concatenated Lempel-Ziv complexity  
 432 ( $p=0.0265$ ) (SI Appendix, Fig. S6) but not joint Lempel-Ziv  
 433 complexity ( $p=0.107$ ) (SI Appendix, Fig. S6). Furthermore,  
 434 after controlling for the median frequency at which signals  
 435 were low-pass filtered across these twelve subjects (four DOC  
 436 patients, five anesthesia subjects, and three generalized seizure  
 437 subjects), our criticality measure  $c$  (at  $\alpha=0.85$ ) was signifi-  
 438 cantly correlated with cross-trial median univariate Lempel-Ziv  
 439 complexity (partial correlation  $\rho=0.66$ ,  $p < 10^{-4}$ ) (Fig. 4C)  
 440 and concatenated Lempel-Ziv complexity ( $\rho=0.66$ ,  $p < 10^{-4}$ )  
 441 but not with joint Lempel-Ziv complexity ( $\rho=0.36$ ,  $p=0.093$ )  
 442 (SI Appendix, Fig. S6); these correlations support the hypoth-  
 443 esis that proximity to the edge-of-chaos critical point mediates  
 444 the information-richness of cortical electrodynamics as well  
 445 as consciousness. Finally, we used a one-tailed block boot-  
 446 strap test (block size = 30 seconds of data), which controls for  
 447 the non-independence of successive time-points by preserving  
 448 local time-series autocorrelations, to test for within-subject  
 449 increases in  $c$  as patients recovered consciousness. We found  
 450 significant increases in  $c$  for all four DOC patients (Fig. 4D),  
 451 which supports the potential diagnostic utility of this new  
 452 criticality measure. Significant within-subject increases in  
 453 univariate Lempel-Ziv complexity were also observed within  
 454 all four DOC patients as they regained consciousness, but not  
 455 in joint or concatenated Lempel-Ziv complexity (SI Appendix,  
 456 Fig. S7).

## 457 Discussion

458 In this paper, we present the first empirical evidence that  
 459 cortical electrodynamics exhibit a high information-carrying  
 460 capacity during conscious states by operating near the math-  
 461 ematically specific critical point separating periodicity and  
 462 chaos. Our evidence was based on the first application (to  
 463 our knowledge) of the recently developed modified 0-1 chaos  
 464 test to neural electrophysiology data. Many systems, includ-  
 465 ing deep neural networks (24), have been shown to exhibit  
 466 their highest information-processing capacity when poised near  
 467 this transition from periodicity/stability to chaos/instability  
 468 (6–9, 34), likely because dynamics near this critical point op-  
 469 timally balance stability with flexibility and responsiveness

to inputs (48). Both our simulation and empirical results suggest that waking cortical dynamics specifically operate on the chaotic/unstable side of this phase transition, which supports the decades-old conjecture that the waking brain might utilize weak dynamical chaos in the service of efficient information processing (49), particularly during conscious states (21). From a computational perspective, it is reasonable that evolution would have tuned waking, conscious cortical dynamics to the chaotic side of this critical point, because traversing this critical point into the chaotic phase coincides with a transition from narrow-band to broadband, multi-frequency oscillations (50), a phenomenon which has been exploited in the engineering context to enable frequency multiplexing (i.e., carrying of information at multiple frequencies) (51); tellingly, such frequency multiplexing is thought to be ubiquitous in mammalian neurodynamics during normal waking states (52). Note that this finding that cortical electrodynamics operate on the chaotic side of criticality during normal waking states is fully consistent with the hypothesis that conscious cortical electrodynamics operate on the "ordered" side of criticality, because, as mentioned in the Introduction, chaos is in fact the "ordered" phase of a dynamical system with respect to this critical point (21) (see SI Appendix, Supplementary Note 1). This result is also consistent with findings that cortical dynamics operate near the critical onset of neuronal avalanches; this is because the neuronal avalanche critical point is distinct from the edge-of-chaos critical point and likely occurs *within* the weakly chaotic regime of neural networks (17), precisely where our results suggest cortical dynamics lie during normal conscious states.

We further present evidence that transitions of cortical electrodynamics away from the edge-of-chaos critical point - either deeper into the chaotic/unstable phase, as our evidence suggests is the case for GABAergic anesthesia, or into the periodic/stable phase, as our evidence suggests is the case for generalized seizures - precipitate a loss of information-richness in cortical dynamics and unconsciousness. These results are consistent with previous findings of a loss of empirical signatures of criticality during these states of unconsciousness (4, 13, 14), but go beyond prior analyses in specifying whether dynamics in these states are sub-critical or super-critical with respect to a specific, mathematically well-defined critical point (in this case, the edge-of-chaos critical point). Finally, we present evidence that psychedelics may increase the information-richness of cortical electrodynamics by moderately stabilizing cortical activity, i.e., by approaching the edge-of-chaos critical point from the chaotic/unstable side of the edge. This result not only supports prior findings suggesting a transition closer to criticality in the LSD state (44), but also confirms the model-based prediction that normal waking cortical dynamics specifically operate on the unstable side of the edge-of-chaos critical point.

We note that our finding of increased instability during GABAergic anesthesia may appear to conflict with a prior report by Solovey and colleagues of increased stability in the cortical dynamics of macaques during propofol anesthesia (53). This seeming discrepancy rests on differing notions of stability, as well as different assumptions about data: Solovey and colleagues defined stability in terms of the eigenvalues of regression matrices estimated from ECoG recordings, a notion of stability which only indicates that a process will not diverge to infinity, and which further assumes that data are both linear

and stochastic (an assumption not supported by our analyses - see SI Appendix, Tables S1-S2). In contrast, we assessed stability in terms of sensitivity to perturbations/inputs, and also used time-series analysis tools which do not assume linearity, and which therefore capture features of data that cannot by definition be captured by linear analysis tools such as autoregressive models. It is also worth noting that two out of the four ECoG data sets used in the report by Solovey and colleagues were the same as the macaque anesthesia data used here (data were downloaded from the same repository - see Materials and Methods), and yet we found robust increases in instability in the anesthetized state for these two macaques, as we did in our three human anesthesia subjects (Fig. 2, SI Appendix, Fig. S4). While the finding that GABAergic anesthetics destabilize cortical electrodynamics may be counter-intuitive, this possibility is further suggested by prior observations of disrupted long-range cortical phase coherence during propofol anesthesia, which is a key prediction of this anesthesia-as-chaos mean-field model (54).

We note that although our criticality measure  $c$  increased in all four DOC patients as they regained consciousness, estimates of chaoticity were significantly higher (within-subject) during unconsciousness in only three out of four of the patients (similar to the GABAergic anesthesia state) and were significantly lower during unconsciousness in the fourth patient (similar to generalized seizures) (SI Appendix, Fig. S7). This may imply that disorders of consciousness constitute a heterogeneous set of conditions with respect to the stability of cortical electrodynamics, a possibility we hope to explore more fully in future work. We further note one important limitation in our analysis of DOC patients, which is the potential confounding effect of drugs administered to the patients: patients were occasionally administered several painkillers and anesthetics on the same day as GCS assessments and EEG data collection (SI Appendix, Table S5) (Materials and Methods). We were unable to ascertain the precise timing of drug administration relative to behavioral assessments and, as such, we cannot rule out the possibility that observed differences in cortical stability/criticality in unconscious states versus conscious states in these DOC patients were possibly driven by the effects of these drugs on their cortical electrodynamics. Moreover, our sample size of DOC patients who regained consciousness was small ( $n=4$ ), and so the utility of our criticality measure  $c$  as a biomarker of consciousness in patients with disorders of consciousness warrants validation in a larger dataset. Along the same lines, if this framework is to be used in the aid of diagnosis, then it will be imperative to develop additional methods for estimating changing levels of chaoticity in cortical electrodynamics. This might be achieved, for example, by observing the consistency of cortical responses to external stimuli (e.g. in response to transcranial magnetic stimulation) - a possibility we plan to explore in future work.

Finally, we note that it would be fruitful to further study neural computation near the edge-of-chaos critical point on a more theoretical level. While important advances have been made along these lines, for example in establishing relationships between this critical point and the trainability of deep neural networks (24), information complexity (6-9), Bayes-optimal perceptual categorization (55), and combinatorial optimization (56), much theoretical work remains to be done to understand the implications of these findings for

neural computation. If the electrodynamics of the cortex during conscious states operate near this critical point, as our work suggests, then improving our theoretical understanding of computation at the onset of chaos will also improve our understanding of how, precisely, neural computation is disrupted in unconsciousness.

## Materials and Methods

**Mean-Field Model Equations of Cortical Electrodynamics.** We here study the mean-field model of Steyn-Ross, Steyn-Ross, and Sleigh (26). The model allows for straightforward manipulation of both the strength and balance of postsynaptic inhibition and excitation, which have long been thought to be key in tuning neural dynamics to chaotic (57), critical (58), and information-rich (58) states. Furthermore, the model is unique in its inclusion of gap junction coupling between inhibitory interneurons, which recent empirical work in zebrafish has shown are also likely important for tuning neural dynamics toward and away from criticality (30).

The model simulates GABAergic anesthesia (e.g. propofol or sevoflurane) as an increase in cortical inhibition coupled with a mild decrease in gap junction coupling between inhibitory interneurons, based on findings that GABAa agonists (59), and GABAergic anesthetics more specifically (60), inhibit gap junction communication (59, 60), and that these compounds also increase postsynaptic inhibition by prolonging inhibitory postsynaptic potentials (61). The model treats waking conscious states as a balance between excitation and inhibition, with strong gap junction coupling between inhibitory interneurons, which yields weak chaos (near edge-of-chaos criticality) in the model's deterministic component (Fig. 2A), arising from interacting Turing (spatial) and Hopf (temporal) instabilities. Finally, a strong reduction of inhibitory gap junction coupling results in a Hopf bifurcation that produces periodic dynamics reminiscent of whole-of-cortex, generalized seizures (26). This is consistent with observations of increased seizure frequency following either genetic ablation (62) or drug-induced reduction (63) of gap junction coupling between inhibitory interneurons. See Steyn-Ross, Steyn-Ross, and Sleigh (26) for full details on model parameters.

The mean excitatory and inhibitory potentials  $V_e$  and  $V_i$  of each simulated neural population in the mean-field model, positioned at a location  $\vec{r} = (x, y)$ , are described by:

$$\tau_b \frac{\delta V_b(\vec{r}, t)}{\delta t} = V_b^{\text{rest}} + \Delta V_b^{\text{rest}} - V_b(\vec{r}, t) + [\rho_e \psi_{eb}(\vec{r}, t) \Phi_{eb}(\vec{r}, t) + \rho_i \psi_{ib}(\vec{r}, t) \Phi_{ib}(\vec{r}, t)] + D_{bb} \nabla^2 V_b(\vec{r}, t) \quad [1]$$

where presynaptic to postsynaptic directionality is indicated by the right arrow, the subscript  $e$  indicates a presynaptic excitatory neural population, the subscript  $i$  indicates a presynaptic inhibitory neural population, and the subscript  $b$  indicates either a postsynaptic excitatory or postsynaptic inhibitory neural population. The bracketed term in Eq. 1 represents voltage inputs via chemical synapses, and the final term in Eq. 1 represents voltage inputs from diffusive gap junction coupling.  $\nabla^2$  is the 2D Laplacian operator.  $D_{bb}$  represents the strength of diffusive gap junction coupling between adjacent neurons, such that  $D_{ee}$  is gap junction coupling between excitatory populations and  $D_{ii}$  is gap junction coupling between inhibitory populations. Because there is far more abundant gap-junction coupling between inhibitory interneurons than excitatory neurons (64),  $D_{ee}$  is set to  $D_{ii}/100$ .  $D_{ii}$  is one of the key biological parameters we vary. For a given excitatory or inhibitory neural population,  $V_b^{\text{rest}}$  is the mean resting potential,  $\tau_b$  is the soma time constant, and  $\rho_b$  is the strength of chemical synapse coupling, which is scaled by the following reversal-potential function  $\psi_{ab}$ :

$$\psi_{ab}(\vec{r}, t) = \frac{V_a^{\text{rev}} - V_b(\vec{r}, t)}{V_a^{\text{rev}} - V_b^{\text{rest}}} \quad [2]$$

which equals one when a neuron is at its resting potential and equals 0 when the membrane potential equals the reversal potential. For

excitatory AMPA receptors,  $V_e^{\text{rev}} = 0$  mV, and for inhibitory GABA receptors,  $V_i^{\text{rev}} = -70$  mV. The  $\Phi_{ab}$  functions in Eq. 1 describe postsynaptic spike-rate fluxes:

$$\left( \frac{\delta}{\delta t} + \gamma_e \right)^2 \Phi_{eb}(\vec{r}, t) = \gamma_e^2 [N_{eb}^\alpha \phi_{eb}^\alpha(\vec{r}, t) + N_{eb}^\beta Q_{e,i}(\vec{r}, t) + \phi_{eb}^{\text{sc}}(\vec{r}, t) + \phi_{eb}^{\alpha, \text{het}}(\vec{r}, t)], \quad [3]$$

$$\left( \frac{\delta}{\delta t} + \gamma_i \right)^2 \Phi_{ib}(\vec{r}, t) = \gamma_i^2 N_{ib}^\beta Q_i(\vec{r}, t) \quad [4]$$

where the  $\alpha$  superscript corresponds to inputs from long-range myelinated axons:  $N_{eb}^\alpha$  is the number of axonal inputs to a population and  $\phi_{eb}^\alpha$  is long-range spike-rate flux. The  $\beta$  superscript corresponds to inputs from short-range chemical synapses, such that  $N_{eb}^\beta$  is the number of local chemical synapses in a neural population.  $Q_{e,i}$  is the local spike-rate flux, and  $\phi_{eb}^{\alpha, \text{het}}$  is a heterogeneous flux input.  $\phi_{eb}^{\text{sc}}$  is white noise, taken to represent random inputs to the cortex from subcortical sources (e.g. sensory inputs); note that the inclusion of a noise term means that the above equations are stochastic differential equations, and that analyses of the ground-truth chaoticity of the model (i.e. its largest Lyapunov exponent) are performed exclusively using the non-stochastic components of the model equations; estimates of chaoticity using the 0-1 test (see below) are performed with the model's noise input turned on, so as to better assess the viability of detecting changing levels of chaoticity in real cortical recordings.  $\gamma_i$  is the inhibitory rate constant and  $\gamma_e$  is the excitatory rate constant, which we vary so as to study the effect of excitation and inhibition on chaos in the model. See Steyn-Ross, Steyn-Ross, and Sleigh (26) for more details on the model equations. Other than the inhibitory gap-junction coupling strength  $D_{ii}$ , the excitatory rate constant  $\gamma_e$ , and the inhibitory rate constant  $\gamma_i$  (all of which we vary in our parameter sweep), all parameters in our simulations are unchanged from the original model, and are taken from the empirical literature (26).  $D_{ii}$  was varied from 0.1 to 0.7 in steps of 0.2, and both  $\gamma_e$  and  $\gamma_i$  were varied from 0.945 to 1.05 in steps of 0.005. Of the 1,936 resulting simulations, 1,160 yielded flat, non-oscillatory activity, likely reflecting stable fixed points of the model; these fixed point solutions were excluded from all analyses, because these non-oscillatory solutions would likely yield high estimates of Lempel-Ziv complexity simply due to the information-richness of the noise perturbations rather than of the underlying system dynamics. This left 776 unique model simulations of oscillatory behavior. Based on prior work (26), the waking conscious simulation corresponded to  $\gamma_e = 1$ ,  $\gamma_i = 1$ , and  $D_{ii} = 0.7$ . The anesthesia simulation corresponded to  $\gamma_e = 1$ ,  $\gamma_i = 1.015$ , and  $D_{ii} = 0.5$ , and the seizure simulation corresponded to  $\gamma_e = 1$ ,  $\gamma_i = 1$ , and  $D_{ii} = 0.1$ . The nearest-to-criticality and maximally information-rich state of the model (see SI Appendix, Figs. S1, S3) corresponded to  $\gamma_e = 1.04$ ,  $\gamma_i = 1$ , and  $D_{ii} = 0.5$ . The model equations were integrated using a forward time centered first-order Euler method, with an integration step of 0.2 ms. Simulated electrodynamics were then downsampled to a sampling frequency of 500 Hz, and the final 10 seconds (i.e. 5,000 time-points) were extracted from the downsampled data, so as to perfectly match the length and sampling frequency of the ECoG and MEG datasets analyzed in this paper.

**Lempel-Ziv Complexity.** Lempel-Ziv complexity is a measure of the size of a signal following Lempel-Ziv compression, and thus tracks the amount of non-redundant information in a signal (31). To compute Lempel-Ziv complexity, a continuous recording must first be discretized. Following prior work (42, 65), we binarized both our simulated and recorded data by thresholding at the mean of the signal's instantaneous amplitude, which is the absolute value of the analytic signal; the analytic signal is  $s(t) + i\bar{s}(t)$ , where  $s(t)$  is the original time-series signal,  $i$  is the imaginary unit, and  $\bar{s}(t)$  is the Hilbert transform of  $s(t)$ . We then computed three measures of Lempel-Ziv complexity: 1) the median univariate Lempel-Ziv complexity across all recorded channels ("Univariate LZc"), 2) the joint Lempel-Ziv complexity between all channels, using the method described by Zozor and colleagues (66), and 3) the Lempel-Ziv complexity of all channels concatenated, time-point by time-point, into a single string, following the method described by Schartner



721 and colleagues (42, 65). Typically, Lempel-Ziv complexity is then  
 722 normalized to provide a single value between 0 and 1. We compared  
 723 several different normalization approaches, and found that the  
 724 approach most robust against changes to a signal's spectral profile  
 725 was to divide the Lempel-Ziv complexity of a signal by the Lempel-  
 726 Ziv complexity of a phase-randomized surrogate of that signal (SI  
 727 Appendix, Fig. S8), following Brito and colleagues (67); note that  
 728 phase-randomized surrogates were generated independently for each  
 729 channel-x-trial in all recordings for the calculation of the Lempel-  
 730 Ziv complexity measures. All measures of Lempel-Ziv complexity  
 731 reported in this paper were normalized in this fashion, and were  
 732 calculated for data low-pass filtered at 45 Hz. Data were low-pass  
 733 filtered at 45 Hz to avoid potential confounds introduced by muscle  
 734 activity at higher frequencies.

### 735 Calculating Largest Lyapunov Exponents in the Mean-Field Model.

736 The ground-truth chaoticity of a system is determined by its largest  
 737 Lyapunov exponent, which is the rate of divergence between initially  
 738 similar trajectories in a system's phase space. A positive largest  
 739 Lyapunov exponent means that a system is chaotic, because it  
 740 indicates exponential divergence of initially similar system states. A  
 741 negative largest Lyapunov exponent indicates periodicity, because  
 742 it indicates exponentially fast convergence of initially similar states.  
 743 A largest Lyapunov exponent near 0 corresponds to edge-of-chaos  
 744 criticality, and near-0 exponents indicate that a system is near  
 745 the edge-of-chaos critical point. The larger the largest Lyapunov  
 746 exponent, the more strongly chaotic the system is. Following Steyn-  
 747 Ross, Steyn-Ross, and Sleight (26), we estimate the largest Lyapunov  
 748 exponent of the mean-field model by simulating two runs of its  
 749 deterministic component (i.e., with its noise inputs turned off), with  
 750 slightly different initial conditions. The divergence between the  
 751 excitatory firing rate of run 1  $Q_e^{(1)}$  and run 2  $Q_e^{(2)}$  is estimated  
 752 as their summed squared-difference  $\epsilon(t)$  down the midline of the  
 753 simulated cortical grid:

$$754 \quad \epsilon(t) = \sum_{i=1}^{N_x} (Q_e^{(1)}(x_i, t) - Q_e^{(2)}(x_i, t))^2 / \epsilon^{\max} \quad [5]$$

755 where  $\epsilon^{\max}$  is a normalization parameter, which equals the maximum  
 756 possible difference between the two runs:

$$757 \quad \epsilon^{\max} = N_x \left( \max(Q_e^{(1)}) - \min(Q_e^{(2)}) \right)^2 \quad [6]$$

758 where  $N_x=120$ , i.e. the number of simulated neural populations in  
 759 the cortical sheet. The rate of divergence between the two runs  
 760  $\epsilon(t)$  is directly related to the largest Lyapunov exponent  $\Lambda$  of the  
 761 system:

$$762 \quad \epsilon(t) = \epsilon(0)\exp(\Lambda t) \quad [7]$$

763 where  $\epsilon(0)$  is the distance between the two runs at  $t = 0$ . The largest  
 764 Lyapunov exponent can therefore be estimated by measuring the  
 765 slope of  $\ln\epsilon(t)$ -versus- $t$ . A positive slope indicates a positive largest  
 766 Lyapunov exponent (and therefore chaotic dynamics), a negative  
 767 slope indicates periodicity, and a flat slope indicates edge-of-chaos  
 768 criticality.

769 **Extracting Low-Frequency Cortical Activity.** The mean-field model  
 770 described above specifically simulates the low-frequency (<4 Hz)  
 771 component of macro-scale electric cortical oscillations. To compare  
 772 the model results against real data, we therefore extracted the  
 773 low-frequency component of both our simulated and real cortical  
 774 signals. Although different frequencies of cortical electrodynamics  
 775 have historically been studied at fixed, canonical frequency bands,  
 776 with choices of oscillation center frequencies and bandwidths varying  
 777 across studies, there is growing evidence that these center frequen-  
 778 cies and bandwidths vary considerably as a function of age, brain  
 779 state, subject, and species, and that low-pass filtering at fixed cano-  
 780 nical frequencies can therefore produce spurious oscillations where no  
 781 oscillations exist (41). Given that our analyses span diverse brain  
 782 states, species, and imaging modalities, it was important to identify  
 783 subject-, trial-, and channel-specific neural oscillation frequencies.  
 784 We therefore identified low-frequency neural activity for each chan-  
 785 nel, for each trial, using the recently developed "Fitting Oscillations  
 786 and One Over F" or "FOOOF" algorithm, which automatically

787 parameterizes neural signals' power spectra (41). The algorithm  
 788 fits a neural power spectrum as a linear combination of the back-  
 789 ground 1/f component with oscillations at specific frequencies that  
 790 rise above this background 1/f component as peaks in the power  
 791 spectrum. The algorithm fits the spectral power  $P$  as:

$$792 \quad P = L + \sum_{n=0}^N G_N \quad [8]$$

793 where  $L$  is the background 1/f power spectrum, and each  $G_n$  is a  
 794 Gaussian fit to a peak rising above the 1/f background:

$$795 \quad G_n = a * \exp\left(\frac{-(F - c)^2}{2w^2}\right) \quad [9]$$

796 where  $a$  is a given oscillation's amplitude,  $c$  is its center frequency,  
 797  $w$  is its bandwidth, and  $F$  is a vector of input frequencies. The 1/f  
 798 background component  $L$  is modeled as an exponential in semilog-  
 799 power space (i.e. with log power values as a function of linear  
 800 frequencies):

$$801 \quad L = b - \log(k + F^\chi) \quad [10]$$

802 where  $b$  is a broadband power offset,  $\chi$  is the spectral slope,  $k$   
 803 controls the "knee" at which the 1/f power spectrum bends, and  $F$   
 804 is a vector of input frequencies.

805 To specifically extract the low-frequency component of neural  
 806 oscillations, we set the input frequency range  $F$  to 1-6 Hz. The  
 807 FOOOF algorithm then identifies the center frequencies and band-  
 808 widths of putative oscillations that rise above the 1/f background  
 809 within this frequency range. For all channels-x-trials in our data, we  
 810 extracted the lowest frequency oscillation identified by the algorithm,  
 811 by low-pass filtering at the high-frequency end of the bandwidth of  
 812 the slowest identified oscillation. If the FOOOF algorithm failed to  
 813 identify an oscillation in the 1-6 Hz range for a particular channel  
 814 in a particular trial, then data for that channel in that trial were  
 815 excluded from further analysis. Across all datasets, the mean frequen-  
 816 cy selected using this approach was 3.27 Hz, with a standard  
 817 deviation of 0.48 Hz. We then low-pass filtered all signals using  
 818 EEGLAB's two-way least-squares FIR low-pass filtering, where  
 819 the filter order was set to  $3 \times \frac{\text{sampling rate}}{\text{lowpass frequency cutoff}}$  (the default of  
 820 EEGLAB). Note that using the FOOOF algorithm improved our  
 821 ability to track chaoticity in the mean-field model of cortical electro-  
 822 dynamics, where the ground truth chaoticity is known (SI Appendix,  
 823 Tables S3-S4), and that estimates of the chaoticity of data low-pass  
 824 filtered using the FOOOF algorithm were stable across different  
 825 simulations (SI Appendix, Fig. S9), which validates its utility in  
 826 tracking chaoticity in real low-frequency cortical electrodynamics.

827 **The Modified 0-1 Test for Chaos.** The 0-1 chaos test was developed  
 828 by Gottwald and Melbourne (36) as a simple tool for testing whether  
 829 a discrete-time system is chaotic, using only a single time-series  
 830 recorded from that system. Gottwald and Melbourne provided an  
 831 early modification to the test, which made it more robust against  
 832 measurement noise (37). Dawes and Freeland added additional  
 833 modifications to the test, improving its ability to distinguish between  
 834 chaotic dynamics and strange non-chaotic or quasiperiodic dynamics  
 835 (39). The modified 0-1 test takes a univariate time-series  $\phi$ , and  
 836 uses that time-series to drive the following two-dimensional system:

$$837 \quad \begin{aligned} p(n+1) &= p(n) + \phi(n)\cos cn \\ q(n+1) &= q(n) + \phi(n)\sin cn \end{aligned} \quad [11]$$

838 where  $c$  is a uniformly distributed random variable bounded between  
 839 0 and  $2\pi$ . For a given  $c$ , the solution to Eq. 1 yields:

$$840 \quad \begin{aligned} p_c(n) &= \sum_{j=1}^n \phi(j)\cos jc \\ q_c(n) &= \sum_{j=1}^n \phi(j)\sin jc \end{aligned} \quad [12]$$

841 If the time-series  $\phi$  is periodic, the motion of  $\mathbf{p}$  and  $\mathbf{q}$  is bounded,  
 842 while if the time-series  $\phi$  is chaotic,  $\mathbf{p}$  and  $\mathbf{q}$  display asymptotic

843 Brownian motion. The time-averaged mean square displacement of  
844  $\mathbf{p}$  and  $\mathbf{q}$  is

$$M_c(n) = \frac{1}{N} \sum_{j=1}^N ([p_c(j+n) - p_c(j)]^2 + [q_c(j+n) - q_c(j)]^2) + \sigma \eta_n. \quad [13]$$

845 where  $\eta_n$  is a uniformly distributed random variable between  $[-\frac{1}{2}, \frac{1}{2}]$   
846 and  $\sigma$  controls the amplitude of the added random variable  $\eta_n$ . We  
847 set  $\sigma$  to 0.5 and normalized the standard deviation of all signals  
848 to 0.5, based on our previously published analyses (25) of the  
849 effect of different parameter values for 0-1 test performance across  
850 diverse datasets. To compute the degree of chaos using a single  
851 statistic  $K$ , the 0-1 test calculates the growth rate of the mean  
852 squared displacement of the two-dimensional system in Eq. 5 using  
853 a correlation coefficient:

$$K_c = \text{corr}(n, M_c(n)) \quad [14]$$

856  $K$  is computed for 100 different values of  $c$ , uniformly randomly  
857 sampled between 0 and  $2\pi$ , and the output of the test is the median  
858  $K$  across different values of  $c$ . As the length of a time-series is  
859 increased, this median  $K$  value will approach 1 for chaotic systems,  
860 and will approach 0 for periodic systems, and will track degree of  
861 chaos for finite-length time-series (36–39). For both our real and  
862 simulated cortical activity, we calculated  $K$  for every channel in a  
863 trial, and estimated that trial's level of chaoticity as the median  
864  $K$ -statistic across all channels in that trial.

865 The 0-1 test is designed to detect and track chaos in discrete-time  
866 systems, and thus signals recorded from non-time-discrete processes  
867 (like neural electrodynamics) must first be transformed into discrete-  
868 time signals before application of the test (38). Two approaches have  
869 been proposed for signal time-discretization prior to application of  
870 the test: downsampling (38), or taking all local minima and maxima  
871 of a continuous signal (40). We here used the latter approach for  
872 all datasets (real and simulated), as it yielded best correspondence  
873 to the ground-truth in our mean-field simulations (SI Appendix,  
874 Tables S3-S4).

875 **A New Time-Series Estimate of Proximity to Edge-of-Chaos Criticality.** With an eye toward clinical applications of this edge-of-chaos  
876 criticality framework in the study of unconsciousness, we here introduce  
877 a new time-series estimate of proximity to the edge-of-chaos  
878 critical point, based on the  $K$ -statistic outputted by the modified  
879 0-1 chaos test (see above). This new measure  $c$  is defined as follows:  
880

$$c = \begin{cases} \frac{K}{\alpha} & K < \alpha \\ 1 - \frac{K-\alpha}{1-\alpha} & K \geq \alpha \end{cases} \quad [15]$$

882 where  $K$  is the output of the 0-1 chaos test and  $\alpha$  is a parameter  
883 that takes on a value between 0 and 1. This criticality measure  $c$  will  
884 approach 1 as  $K$  approaches  $\alpha$ , and will approach 0 as  $K$  approaches  
885 either 0 (periodicity) or 1 (strong chaos). As noted in the Results,  
886 precise choice of  $\alpha$  may bias  $c$  toward either periodic near-critical or  
887 chaotic near-critical dynamics (i.e., to dynamics on either the stable  
888 or unstable side of the edge-of-chaos critical point), and thus the  
889 optimal value of  $\alpha$  for potential clinical assessments of consciousness  
890 using  $c$  will need to be determined by further empirical work.

891 **Epilepsy Data.** Surface ECoG data from nine epilepsy patients were  
892 downloaded from the European Epilepsy Database (68). Of these,  
893 only two subjects experienced fully generalized seizures (in both  
894 cases, seizures were focal with secondary generalizations). Subject  
895 1 was a 42 year old male with epilepsy caused by right cortical  
896 dysplasia, and who was receiving the anticonvulsant medication  
897 lamotrigine. The subject had six intracranial electrode strips (26  
898 electrodes in total) placed over right lateral temporal cortex to  
899 monitor seizure focus. Subject 2 was a 14 year old female with  
900 cryptogenic epilepsy (i.e. unknown cause) who was receiving the  
901 anticonvulsant medications valproate and topiramate; the subject  
902 had one grid and six electrode strips (96 electrodes total) placed  
903 over left temporal and lateral left temporal cortex to monitor seizure  
904 focus. Signals from both subjects were recorded at a sampling rate  
905 of 1024 Hz. Data were demeaned, detrended, and bandstop filtered  
906 at 50 Hz and harmonics (the line noise frequency in Europe). Data

were resampled to 500 Hz, divided into 10-second trials, and re-  
referenced to the common average. For the seizure state, we only  
included trials for which seizures were fully generalized across all  
channels for the entire trial duration. The data were then visually  
inspected for artifacts. Data from electrodes with consistent motion  
or drift artifacts were removed, and 10-second trials with large  
motion artifacts spanning multiple electrodes were removed.

Additionally, a magnetoencephalography (MEG) recording of  
one patient's generalized absence seizure, previously published by  
Dominguez and colleagues (69), was re-analyzed. Data were pro-  
vided by D.M.M. Note that MEG datasets were recorded for two  
other epilepsy patients by Dominguez and colleagues, but that these  
were for tonic seizures; the muscle convulsions during these tonic  
episodes produced large motion artifacts in the MEG data, which  
rendered analysis of low-frequency periodicity impossible. These  
datasets were therefore not analyzed. The patient whose data were  
re-analyzed in the present paper (Seizure Subject 3 in SI Appendix,  
Figs. S1-2) was an 18 year-old female who was receiving a low  
dose of valproate, and with no reported structural abnormalities or  
prior brain surgery. Data from this patient were recorded at 625 Hz  
using a CTF Omega 151 channel whole-head system (CTF Systems,  
Port Coquitlam, British Columbia, Canada). Data were split into  
10-second trials, demeaned, detrended, and bandstop filtered at 60  
Hz and harmonics (the line noise frequency in Canada, where data  
were collected). Data were then visually inspected. Consistently  
motion or drift artifact-affected channels were removed, and trials  
with large motion artifacts across channels were removed. Data  
were then downsampled to 500 Hz. We then ran an independent  
components analysis on the data, and removed components that  
corresponded to ocular or cardiac artifacts.

See SI Appendix, Fig. S10 for 10-second time-traces of these  
subjects' cortical electrodynamics during generalized seizures.

**Human Anesthesia Data.** Surface ECoG recordings from three hu-  
man epilepsy patients given propofol anesthesia prior to surgical  
resection of their epileptic focus were analyzed. Data were collected  
at the University of California at Irvine, Medical Center. All pa-  
tients provided informed consent in accordance with the local ethics  
committees of the University of California, Irvine (University of  
California at Irvine Institutional Review Board Protocol Number  
2014-1522) and University of California, Berkeley (University of Cal-  
ifornia at Berkeley Committee for the Protection of Human Subjects  
Protocol Number 2010-01-520), and provided written consent before  
data recording. Electrode placement was determined only by clinical  
criteria (Ad-Tech, SEEG: 5 mm inter-electrode spacing; Integra,  
Grids: 1 cm, 5 or 4 mm spacing). ECoG data were recorded using  
a Nihon Kohden recording system (256 channel amplifier, model  
JE120A), analogue-filtered above 0.01 Hz and digitally sampled at  
5 kHz.

Patient 1 (Human Anesthesia Subject 1 in SI Appendix, Figs.  
S1-2) was a right-handed 25 year-old female with a diffuse lesion  
in the right supplementary motor area. The patient had one 8x8  
grid placed over the right frontal lobe, covering superior temporal  
gyrus, postcentral gyrus, inferior parietal lobule, superior temporal  
gyrus, precentral gyrus, middle frontal gyrus, inferior frontal gyrus,  
and middle temporal gyrus; and two 2x5 anterior interhemisphere  
bilateral grids and two 2x8 posterior interhemisphere bilateral grids  
covering superior frontal gyrus and medial frontal gyrus, for a total of  
116 cortical contacts. See SI Appendix, Fig. S11 for MRI scans with  
Patient 1's cortical grids. The patient received 100 mg of propofol  
and 100 mcg of fentanyl prior to surgical resection of their epileptic  
focus. Their "waking conscious" data consisted of the twenty minutes  
prior to anesthetic induction, and their "anesthesia" data consisted  
of the twenty minutes following the loss of responsiveness to verbal  
commands.

Patient 2 (Human Anesthesia Subject 2 in SI Appendix, Figs.  
S1-2) was a 46 year-old, right-handed female with a lesion in the left  
supplementary motor area. The patient had one 8x8 grid placed  
over the left frontal lobe, covering middle temporal gyrus, superior  
temporal gyrus, inferior frontal gyrus, middle frontal gyrus, superior  
frontal gyrus, precentral gyrus, superior temporal gyrus, postcentral  
gyrus, and inferior parietal lobule; one 2x8 strip placed over left  
medial cortex, covering left medial frontal gyrus, left cingulate gyrus,  
and left superior frontal gyrus; and one 2x8 strip placed over right  
medial cortex, covering right medial frontal gyrus, right cingulate

gyrus, and right superior frontal gyrus, for a total of 96 contacts. See SI Appendix, Fig. S11 for MRI scans with Patient 2's cortical grids. The patient received 140 mg of propofol and 50 mcg of fentanyl prior to surgery; at loss of consciousness, the patient received 50 mg of the muscle relaxant rocuronium; four minutes after loss of consciousness, the patient began receiving sevoflurane (another GABAergic anesthetic) for maintenance of anesthesia; note that the predictions of the mean-field model regarding the anesthesia state still hold for a combination of propofol and sevoflurane, as the model predictions should pertain to any GABAergic anesthetic. The patient's "waking conscious" data consisted of the 19 minutes prior to anesthetic induction, and their "anesthesia" data consisted of the 16.8 minutes following the loss of responsiveness to verbal commands.

Patient 3 (Human Anesthesia Subject 3 in SI Appendix, Figs. S1-2) was a 20 year-old right-handed female who had previously received a left temporal lobectomy. The patient had one 4x8 grid placed over left frontal cortex, with contacts over middle frontal gyrus, Brodmann area 9, inferior frontal gyrus, superior temporal gyrus, middle temporal gyrus, precentral gyrus, and superior frontal gyrus; another 4x4 grid over left frontal cortex, with contacts over the orbital gyrus, inferior frontal gyrus, middle frontal gyrus, superior frontal gyrus, rectal gyrus, and superior temporal gyrus; a 2x6 grid over the temporal lobe, with contacts over the fusiform gyrus, inferior temporal gyrus, and middle temporal gyrus, as well as four contacts over the declive and one over the tuber of the cerebellum; and one 8x8 grid with contacts over parts of parietal, temporal, and occipital cortices, including postcentral gyrus, precentral gyrus, inferior parietal lobule, superior parietal lobule, Brodmann area 40, Brodmann area 7, supramarginal gyrus, and superior temporal gyrus, for a total of 124 surface electrodes. See SI Appendix, Fig. S11 for MRI scans with Patient 3's ECoG grids. The patient received 150 mg of propofol and 100 mcg of fentanyl prior to surgical resection of their epileptic focus. Their "waking conscious" data consisted of the eight minutes prior to anesthetic induction, and their "anesthesia" data consisted of the 10.17 minutes following the loss of responsiveness to verbal commands.

Signals for all three patients were recorded at a sampling rate of 1,000 Hz. Epileptic activity was assessed by an experienced neurologist (R.T.K) and removed. Data were split into 10-second trials, demeaned, band-stop filtered at 60 Hz and harmonics (the line noise frequency in the United States, where data were collected), detrended, downsampled to 500 Hz, and re-referenced to the common average. Data were then visually inspected for artifacts. Data from electrodes with consistent drift or motion artifacts were removed, and 10-second trials with large motion artifacts spanning multiple electrodes were removed.

**Macaque Anesthesia Data.** Open-source ECoG recordings spanning the left cortices (including occipital, parietal, temporal, and frontal lobes) of two male macaques were downloaded from Neurotycho.org (70). See SI Appendix, Fig. S11 for an MRI scan showing the electrode placement of Macaques 1 and 2. Data were collected during awake/resting and propofol anesthesia states. The macaques were seated with head and arm movement restricted. Macaque 1 (Macaque Anesthesia Subject 1 in SI Appendix, Figs. S1-2) was intravenously administered 5.2 mg/kg of propofol, and Macaque 2 (Macaque Anesthesia Subject 2 in SI Appendix, Figs. S1-2) was intravenously administered 5 mg/kg of propofol. Loss of consciousness was determined by the emergence of low-frequency oscillations and the cessation of responses to physical stimuli. All data for the propofol condition are from the macaques' unconscious state, and all data from the awake condition are from the macaques' eyes-open state (i.e., data for which the eyes were covered were excluded). Signals were recorded at a sampling rate of 1,000 Hz. Data were split into 10-second trials, demeaned, band-stop filtered at 50 Hz and harmonics (the line noise frequency in Japan, where data were collected), detrended, downsampled to 500 Hz, and re-referenced to the common average. Data were then visually inspected for motion artifacts. Data from electrodes with consistent artifacts were removed, and 10-second trials with artifacts spanning multiple electrodes were removed.

**Human Lysergic Acid Diethylamide Data.** Previously published (71) MEG recordings of nineteen humans following intravenous admin-

istration of either 75  $\mu$ g of lysergic acid diethylamide (LSD) or a saline placebo were re-analyzed. These data were provided by S.M. and R.C. Data from three subjects were excluded because of persistent motion or drift artifacts in their MEG signal across most trials. Of the sixteen remaining subjects, three were females, and the average age was 32.06 (with a standard deviation of 7.71 years). Due to the slow pharmacodynamics of LSD, MEG data were recorded four hours after drug administration. Subjects lay in a supine position during data acquisition. MEG signals were recorded using a CTF 275-channel radial gradiometer system with a sampling frequency of 1200 Hz. After the MEG recordings were collected, visual analogue scale ratings of the intensity of the LSD experience (on a scale from 0 to 20 in increments of 1) were presented to subjects on a projection screen visible from inside the scanner, which the subjects completed via button press (see Carhart-Harris et al (71) for more details). MEG data were split into 10-second trials, demeaned, detrended, and bandstop filtered at 50 Hz and harmonics (the line noise frequency in the United Kingdom, where data were collected). Data were then visually inspected. Consistently motion or drift artifact-affected channels were removed, and trials with large motion artifacts across channels were removed. Data were then downsampled to 500 Hz. We then ran an independent components analysis on the data, and removed components that corresponded to ocular or cardiac artifacts.

**Clinical DOC data.** Data were collected from four traumatic brain injury (TBI) patients admitted at the UCLA Ronald Reagan University Medical Center intensive care unit (ICU). Several criteria were applied for participation in the study in order to limit the investigation to those patients recovering from unconsciousness. Inclusion criteria: Glasgow Coma Scale (GCS) score  $\leq 8$  or an admission GCS score of 9-14 with computed tomography (CT) evidence of intracranial bleeding. Exclusion criteria: GCS  $> 14$  with non-significant head CT, history of neurological disease or TBI, and brain death. The UCLA institutional review board approved the study. Informed consent was obtained according to local regulations. To manage symptoms and/or reduce cerebral metabolism, medications were administered to patients as needed, noted on a daily basis and sorted into appropriate categories: propofol, barbiturates, benzodiazepines, opioids, and dissociative anesthetics. Behavioral assessments were performed several times daily in the ICU and used the GCS to assess patients' conscious state. EEG data were recorded continuously (Cz reference) at a sampling rate of 250 Hz for several days or longer while patients were in the ICU. After data acquisition with Persyst software (Persyst Development Corporation, Solana Beach, CA, USA), data were exported in EDF format to MATLAB (The MathWorks, Inc., Natick, MA, USA) for analysis.

To analyze patients during periods of both high responsiveness (conscious) and minimal responsiveness (unconscious), we extracted 60 minutes of EEG from 13 channels common to all patients (Fp1, Fp2, F7, F8, T3, C3, Cz, C4, T4, T5, O1, O2, T6) at timepoints corresponding to consciousness, defined as GCS motor score  $\geq 5$  or GCS verbal score  $\geq 4$  (46, 47), and unconsciousness. EEG sections were spaced a minimum of 12 hours apart according to the following procedure, applied separately for conscious and unconscious data: 1) sorting each patient's GCS scores from or high to low (conscious) or low to high (unconscious), 2) appending the highest (conscious) or lowest (unconscious) score to a second list, and 3) crawling down the first list of GCS scores and adding each timepoint that was at least 12 hours from any timepoint on the second list to the second list. 60-minute EEG sections were then extracted from the second list's timepoints in order to sample the desired periods of consciousness and unconsciousness. Data were split into 10-second trials, demeaned, detrended, and re-referenced to the common average. Data were then visually inspected for artifacts. Data from electrodes with consistent drift or motion artifacts were removed, and 10-second trials with large motion artifacts spanning multiple electrodes were removed. We then ran an independent components analysis on the data to remove ocular or cardiac artifacts.

- 1123 **ACKNOWLEDGMENTS.** This work was supported by the National Institutes of Health grant RO1 MH111737 awarded to M.D.,  
1124 the National Institute of Neurological Disorders and Stroke grant  
1125 NS21135 awarded to R.T.K., and a Tiny Blue Dot Foundation grant  
1126 awarded to M.M.M. We would like to thank Michael A. Silver for  
1127 his feedback on this work, Igor V. Ovchinnikov for guidance on the  
1128 physics of edge-of-chaos criticality, and Julie Ashworth for extensive  
1129 technical help. We would additionally like to thank Norman Spivak  
1130 for organizing the medication records of our subjects with disorders  
1131 of consciousness, and Courtney Real, Vikesh Shrestha, and Jesus E.  
1132 Ruiz Tejada for helping with clinical data collection and curation.
- 1134 1. RL Carhart-Harris, et al., The entropic brain: a theory of conscious states informed by neuro-  
1135 imaging research with psychedelic drugs. *Front. human neuroscience* **8**, 20 (2014).  
1136 2. RL Carhart-Harris, The entropic brain-revisited. *Neuropharmacology* **142**, 167–178 (2018).  
1137 3. D Sornette, *Critical phenomena in natural sciences: chaos, fractals, selforganization and*  
1138 *disorder: concepts and tools.* (Springer Science & Business Media), (2006).  
1139 4. L Cocchi, LL Gollo, A Zalesky, M Breakspear, Criticality in the brain: A synthesis of neurobi-  
1140 ological, models and cognition. *Prog. neurobiology* **158**, 132–152 (2017).  
1141 5. WL Shew, D Plenz, The functional benefits of criticality in the cortex. *The neuroscientist* **19**,  
1142 88–100 (2013).  
1143 6. CG Langton, Computation at the edge of chaos: phase transitions and emergent computation.  
1144 *Phys. D: Nonlinear Phenom.* **42**, 12–37 (1990).  
1145 7. JP Crutchfield, K Young, Computation at the onset of chaos in *The Santa Fe Institute, West-*  
1146 *ville.* (Citeseer), (1988).  
1147 8. J Boedecker, O Obst, JT Lizier, NM Mayer, M Asada, Information processing in echo state  
1148 networks at the edge of chaos. *Theory Biosci.* **131**, 205–213 (2012).  
1149 9. N Bertschinger, T Natschläger, Real-time computation at the edge of chaos in recurrent  
1150 neural networks. *Neural computation* **16**, 1413–1436 (2004).  
1151 10. V Priesemann, M Valderrama, M Wibral, M Le Van Quyen, Neuronal avalanches differ from  
1152 wakefulness to deep sleep—evidence from intracranial depth recordings in humans. *PLoS*  
1153 *Comput. Biol.* **9**, e1002985 (2013).  
1154 11. V Priesemann, et al., Spike avalanches in vivo suggest a driven, slightly subcritical brain state.  
1155 *Front. systems neuroscience* **8**, 108 (2014).  
1156 12. DR Chialvo, Emergent complex neural dynamics. *Nat. physics* **6**, 744–750 (2010).  
1157 13. ED Fagerholm, et al., Cortical entropy, mutual information and scale-free dynamics in waking  
1158 mice. *Cereb. cortex* **26**, 3945–3952 (2016).  
1159 14. E Tagliazucchi, et al., Large-scale signatures of unconsciousness are consistent with a de-  
1160 parture from critical dynamics. *J. The Royal Soc. Interface* **13**, 20151027 (2016).  
1161 15. J Witting, V Priesemann, 25 years of criticality in neuroscience—established results, open  
1162 controversies, novel concepts. *Curr. opinion neurobiology* **58**, 105–111 (2019).  
1163 16. V Priesemann, O Shriki, Can a time varying external drive give rise to apparent criticality in  
1164 neural systems? *PLoS computational biology* **14**, e1006081 (2018).  
1165 17. K Kanders, L Lorimer, R Stoop, Avalanche and edge-of-chaos criticality do not necessarily  
1166 co-occur in neural networks. *Chaos: An Interdiscip. J. Nonlinear Sci.* **27**, 047408 (2017).  
1167 18. E Tagliazucchi, P Balenzuela, D Fraiman, DR Chialvo, Criticality in large-scale brain fMRI  
1168 dynamics unveiled by a novel point process analysis. *Front. physiology* **3**, 15 (2012).  
1169 19. H Lee, et al., Relationship of critical dynamics, functional connectivity, and states of con-  
1170 sciousness in large-scale human brain networks. *Neuroimage* **188**, 228–238 (2019).  
1171 20. MA Colombo, et al., The spectral exponent of the resting EEG indexes the presence of con-  
1172 sciousness during unresponsiveness induced by propofol, xenon, and ketamine. *Neuroimage*  
1173 **189**, 631–644 (2019).  
1174 21. IV Ovchinnikov, et al., Criticality or Supersymmetry Breaking? *Symmetry* **12**, 805 (2020).  
1175 22. V Zimmern, Why Brain Criticality Is Clinically Relevant: A Scoping Review. *Front. Neural*  
1176 *Circuits* **14**, 54 (2020).  
1177 23. I Ovchinnikov, Introduction to supersymmetric theory of stochastics. *Entropy* **18**, 108 (2016).  
1178 24. SS Schoenholz, J Gilmer, S Ganguli, J Sohl-Dickstein, Deep information propagation. *arXiv*  
1179 *preprint arXiv:1611.01232* (2016).  
1180 25. D Toker, FT Sommer, M D'Esposito, A simple method for detecting chaos in nature. *Commun.*  
1181 *biology* **3**, 1–13 (2020).  
1182 26. ML Steyn-Ross, DA Steyn-Ross, JW Sleigh, Interacting Turing-Hopf instabilities drive  
1183 symmetry-breaking transitions in a mean-field model of the cortex: a mechanism for the  
1184 slow oscillation. *Phys. Rev. X* **3**, 021005 (2013).  
1185 27. LE Martinet, et al., Human seizures couple across spatial scales through travelling wave  
1186 dynamics. *Nat. communications* **8**, 14896 (2017).  
1187 28. MT Wilson, JW Sleigh, DA Steyn-Ross, ML Steyn-Ross, General anesthetic-induced seizures  
1188 can be explained by a mean-field model of cortical dynamics. *Anesthesiol. The J. Am. Soc.*  
1189 *Anesthesiol.* **104**, 588–593 (2006).  
1190 29. MT Wilson, et al., An analysis of the transitions between down and up states of the cortical  
1191 slow oscillation under urethane anaesthesia. *J. biological physics* **36**, 245–259 (2010).  
1192 30. A Ponce-Alvarez, A Jouary, M Privat, G Deco, G Sumbre, Whole-brain neuronal activity dis-  
1193 plays crackling noise dynamics. *Neuron* **100**, 1446–1459 (2018).  
1194 31. A Lempel, J Ziv, On the complexity of finite sequences. *IEEE Transactions on information*  
1195 *theory* **22**, 75–81 (1976).  
1196 32. TM Cover, JA Thomas, *Elements of information theory.* (John Wiley & Sons), (2012).  
1197 33. J Frohlich, D Toker, MM Monti, Consciousness among delta waves: a paradox? *Brain* (2021).  
1198 34. R Legenstein, W Maass, Edge of chaos and prediction of computational performance for  
1199 neural circuit models. *Neural Networks* **20**, 323–334 (2007).  
1200 35. U Simonsohn, Two lines: A valid alternative to the invalid testing of U-shaped relationships  
1201 with quadratic regressions. *Adv. Methods Pract. Psychol. Sci.* **1**, 538–555 (2018).  
1202 36. GA Gottwald, I Melbourne, A new test for chaos in deterministic systems in *Proceedings*  
1203 *of the Royal Society of London A: Mathematical, Physical and Engineering Sciences.* (The  
1204 Royal Society), Vol. 460, pp. 603–611 (2004).  
37. GA Gottwald, I Melbourne, Testing for chaos in deterministic systems with noise. *Phys. D:*  
1205 *Nonlinear Phenom.* **212**, 100–110 (2005).  
38. GA Gottwald, I Melbourne, On the implementation of the 0–1 test for chaos. *SIAM J. on Appl.*  
1207 *Dyn. Syst.* **8**, 129–145 (2009).  
39. J Dawes, M Freeland, The '0–1 test for chaos' and strange nonchaotic attractors. *preprint*  
1209 (2008).  
40. JSA Eyébé Fouda, B Bodo, SL Sabat, JY Effia, A modified 0-1 test for chaos detection in  
1211 oversampled time series observations. *Int. J. Bifurc. Chaos* **24**, 1450063 (2014).  
41. T Donoghue, et al., Parameterizing neural power spectra into periodic and aperiodic compo-  
1213 nents. *Nat. neuroscience* **23**, 1655–1665 (2020).  
42. MM Scharfner, RL Carhart-Harris, AB Barrett, AK Seth, SD Muthukumaraswamy, Increased  
1215 spontaneous MEG signal diversity for psychoactive doses of ketamine, LSD and psilocybin.  
1216 *Sci. Reports* **7**, 46421 (2017).  
43. C Timmermann, et al., Neural correlates of the DMT experience assessed with multivariate  
1218 EEG. *Sci. reports* **9**, 1–13 (2019).  
44. S Atasoy, et al., Connectome-harmonic decomposition of human brain activity reveals dynam-  
1220 ical repertoire re-organization under LSD. *Sci. reports* **7**, 17661 (2017).  
45. C Schnakers, et al., Diagnostic accuracy of the vegetative and minimally conscious state:  
1222 clinical consensus versus standardized neurobehavioral assessment. *BMC neurology* **9**, 35  
1223 (2009).  
46. JS Crone, BJ Bio, PM Vespa, ES Lutkenhoff, MM Monti, Restoration of thalamo-cortical  
1225 connectivity after brain injury: recovery of consciousness, complex behavior, or passage of  
1226 time? *J. neuroscience research* **96**, 671–687 (2018).  
47. JS Crone, ES Lutkenhoff, PM Vespa, MM Monti, A systematic investigation of the association  
1228 between network dynamics in the human brain and the state of consciousness. *Neurosci.*  
1229 *consciousness* **2020**, niaa008 (2020).  
48. A Roli, M Villani, A Filisetti, R Serra, Dynamical criticality: overview and open questions. *J.*  
1231 *Syst. Sci. Complex.* **31**, 647–663 (2018).  
49. H Korn, P Faure, Is there chaos in the brain? II. Experimental evidence and related models.  
1233 *Comptes rendus biologies* **326**, 787–840 (2003).  
50. YC Lai, Analytic signals and the transition to chaos in deterministic flows. *Phys. Rev. E* **58**,  
1235 R6911 (1998).  
51. T Matsuura, A Uchida, S Yoshimori, Chaotic wavelength division multiplexing for optical com-  
1237 munication. *Opt. letters* **29**, 2731–2733 (2004).  
52. G Buzsáki, *Rhythms of the Brain.* (Oxford University Press), (2006).  
53. G Solovey, et al., Loss of consciousness is associated with stabilization of cortical activity. *J.*  
1240 *Neurosci.* **35**, 10866–10877 (2015).  
54. K Wang, ML Steyn-Ross, DA Steyn-Ross, MT Wilson, JW Sleigh, EEG slow-wave coherence  
1242 changes in propofol-induced general anesthesia: experiment and theory. *Front. systems*  
1243 *neuroscience* **8**, 215 (2014).  
55. K Friston, M Breakspear, G Deco, Perception and self-organized instability. *Front. computa-*  
1245 *tional neuroscience* **6**, 44 (2012).  
56. IV Ovchinnikov, KL Wang, Stochastic dynamics and combinatorial optimization. *Mod. Phys.*  
1247 *Lett. B* **31**, 1750285 (2017).  
57. C Van Vreeswijk, H Sompolinsky, Chaos in neuronal networks with balanced excitatory and  
1249 inhibitory activity. *Science* **274**, 1724–1726 (1996).  
58. WL Shew, H Yang, S Yu, R Roy, D Plenz, Information capacity and transmission are maxi-  
1251 mized in balanced cortical networks with neuronal avalanches. *J. neuroscience* **31**, 55–63  
1252 (2011).  
59. K Shinohara, H Hiruma, T Funabashi, F Kimura, GABAergic modulation of gap junction com-  
1254 munication in slice cultures of the rat suprachiasmatic nucleus. *Neuroscience* **96**, 591–596  
1255 (2000).  
60. K Wentlandt, M Samoiloova, PL Carlen, H El Beheiry, General anesthetics inhibit gap junction  
1257 communication in cultured organotypic hippocampal slices. *Anesth. & Analg.* **102**, 1692–1698  
1258 (2006).  
61. A Kitamura, W Marszalec, JZ Yeh, T Narahashi, Effects of halothane and propofol on exci-  
1260 tatory and inhibitory synaptic transmission in rat cortical neurons. *J. Pharmacol. Exp. Ther.*  
1261 **304**, 162–171 (2003).  
62. I Pais, et al., Sharp wave-like activity in the hippocampus in vitro in mice lacking the gap  
1263 junction protein connexin 36. *J. neurophysiology* **89**, 2046–2054 (2003).  
63. L Yang, DS Ling, Carbenoxolone modifies spontaneous inhibitory and excitatory synaptic  
1265 transmission in rat somatosensory cortex. *Neurosci. letters* **416**, 221–226 (2007).  
64. MV Bennett, RS Zukin, Electrical coupling and neuronal synchronization in the mammalian  
1267 brain. *Neuron* **41**, 495–511 (2004).  
65. M Scharfner, et al., Complexity of multi-dimensional spontaneous EEG decreases during  
1269 propofol induced general anaesthesia. *PLoS one* **10**, e0133532 (2015).  
66. S Zozor, P Ravier, O Buttelli, On Lempel–Ziv complexity for multidimensional data analysis.  
1271 *Phys. A: Stat. Mech. its Appl.* **345**, 285–302 (2005).  
67. MA Brito, D Li, GA Mashour, D Pal, State-Dependent and Bandwidth-Specific Effects of Ke-  
1273 tamine and Propofol on Electroencephalographic Complexity in Rats. *Front. Syst. Neurosci.*  
1274 **14**, 50 (2020).  
68. M Ihle, et al., EPILEPSIAE—A European epilepsy database. *Comput. methods programs*  
1276 *biomedicine* **106**, 127–138 (2012).  
69. LG Dominguez, et al., Enhanced synchrony in epileptiform activity? Local versus distant  
1278 phase synchronization in generalized seizures. *J. neuroscience* **25**, 8077–8084 (2005).  
1279 70. Y Nagasaka, K Shimoda, N Fujii, Multidimensional recording (MDR) and data sharing: an  
1280 ecological open research and educational platform for neuroscience. *PLoS one* **6**, e22561  
1281 (2011).  
71. RL Carhart-Harris, et al., Neural correlates of the LSD experience revealed by multimodal  
1283 neuroimaging. *Proc. Natl. Acad. Sci.* **113**, 4853–4858 (2016).  
1284
